# Supplementary material for: Source, transport and fate of soil organic matter inferred from microbial biomarker lipids on the East Siberian Arctic Shelf
Source: Copernicus journal article supplement (doi:10.5194/bg-13-4899-2016), 2016-09-06
Supplement: Supplementary file 3 [file Table S2.xlsx]

## Sheet: Table S2
	Table S2. ESAS sample details including location, distance from River Mouths, bulk parameters, molecular index values (BIT and R'soil) and individual individual BHP concentrations.
	Sample	Latitude	Longitude	Distance from river mouth (km)	Bottom depth (m)	OC (%)a,b	d13C (‰)a	d15N (‰)a	BITc	BHP concentrations (ug g-1OC )																total BHPs	total non-methyl soil BHPs	Rsoil	R'soil
										D6 1f	1f	1f'	2f	1g	1e	1d	1c	1h	1i	1a	2a	1b	2b	1b'	2b'
	Buor-Khaya Bay
	TB-17	72.2907	132.921	117.808	21	1.5097	-25.55	3.316	0.411639	4.33111	117.051	11.1807	10.2815	2.28988	15.6215	4.27378	1.97557	6.73001	0.569776	62.7366	2.41661	28.1203	6.41952	7.95276	3.44837	285.399	98.8096	0.486945	0.457747
	TB-18	72.1667	133	106.999	16	0.8	-25.8	2.7	0.342804	3.00698	85.2453	10.052	7.54239	1.9627	10.5354	2.91072	1.50102	4.70341	1.24894	58.5744	2.19203	22.2568	5.23371	6.5684	2.24641	225.781	87.3996	0.532434	0.506239
	TB-19	72.0862	132.776	100.229	14	0.4655	-26.036	3.316	0.485768	4.20135	98.8515	14.1657	6.65444	1.206	18.1574	2.20637	0	2.51582	0.535885	56.7673	2.0462	25.7565	5.21061	6.3329	2.27948	246.887	88.8567	0.498838	0.473377
	TB-20	71.9263	132.615	95.6239	N/A	0.08	N/A	N/A	0.678752	9.26772	129.333	18.3933	11.3934	1.8686	11.9433	1.48053	0	0	0	36.8482	0	25.8757	0	4.2024	0	250.606	66.9263	0.34101	0.34101
	TB-22	71.8751	132.115	104.511	15	0.4	-25.3	1.5	0.441357	1.23563	29.3672	2.57199	2.95942	0	3.63345	0.794829	0	0	0	7.47526	0	4.59441	0	4.59441	0	57.2266	16.6641	0.362017	0.362017
	TB-23	71.8256	131.668	97.1831	20	1.5909	-25.772	3.316	0.489389	3.79803	95.5225	10.7376	9.39463	2.24965	13.5167	3.14147	1.88693	6.1627	0.913453	71.2281	2.35128	29.7495	6.60748	9.55248	4.02169	270.834	110.53	0.56389	0.536417
	TB-24	71.7637	131.166	85.0881	16	1.867	-25.623	3.316	0.529141	5.15303	119.443	12.2489	11.7058	2.24623	20.6267	3.42244	2.27539	8.51553	0.908695	76.3854	3.72781	33.2645	5.70683	10.1602	3.88113	319.672	119.81	0.527087	0.500767
	TB-25	71.7201	130.83	80.7062	13	1.8836	-25.791	3.316	0.545796	5.78417	104.633	6.02648	9.85402	1.97847	21.0694	3.65418	1.79564	7.63827	0.894208	73.6032	2.76128	29.35	6.49186	5.81795	2.1015	283.453	108.771	0.534466	0.509697
	TB-26	71.6862	130.579	77.7014	12.5	2.0895	-25.792	3.316	0.619906	1.25668	26.5482	2.67298	2.89073	0	9.41065	1.21224	0	2.09595	0.396465	36.6331	1.35963	15.8633	3.0603	3.7525	1.29395	108.447	56.2489	0.700058	0.679358
	TB-27	71.6583	130.325	75.2444	10.6	1.9	-26	2.3	0.646767	6.54817	121.452	14.2714	9.97072	4.63545	15.6931	3.89028	3.0485	15.7428	1.83505	68.7219	2.25322	27.3061	5.93722	4.46327	1.63315	307.403	100.491	0.475973	0.452778
	TB-28	71.6182	130.037	70.2511	5.3	2.1495	-26.163	3.316	0.781927	1.60782	44.6087	6.70475	4.18685	1.60329	6.20667	0.796299	0.90543	5.63424	0.544197	35.3932	1.07745	12.7129	1.7923	3.60129	1.15465	128.53	51.7074	0.555427	0.536851
	TB-30	71.8667	129.833	44.7677	5	2.0361	-26.029	3.316	0.875932	3.40054	74.7038	10.6473	6.92621	0.590164	9.3594	0.970618	0	9.84509	0.742175	60.3468	1.65649	21.1941	3.649	6.8889	2.24194	213.162	88.4298	0.562319	0.54207
	TB-31	71.8628	130.323	55.9597	12	2.2487	-25.915	3.316	0.635703	2.31635	45.8264	5.27197	5.28062	0.541439	11.8985	1.89026	1.22731	7.00998	0.844023	37.3259	1.40573	15.6966	3.06789	5.38532	2.02159	147.01	58.4078	0.58614	0.560351
	TB-32	71.8621	131.093	75.2444	12	1.9	-25.7	3	0.556579	5.78315	118.413	11.6817	10.7042	3.1738	30.7944	5.32893	3.61302	9.13866	1.56635	71.7325	3.04729	30.5138	6.25355	10.0911	3.96628	325.801	112.337	0.514737	0.486836
	TB-33	72.0919	131.088	65.0674	14.5	2.2	-25.8	3.4	0.528632	4.06172	90.4749	7.32774	7.72969	1.10758	31.6626	5.42711	1.74547	13.4504	1.60949	64.8505	2.72743	28.157	5.81418	7.46257	3.08861	276.697	100.47	0.553376	0.526173
	TB-34	72.2868	131.088	62.7148	16	1.9	-25.7	2.9	0.407005	3.46284	88.2338	10.1891	7.28483	1.80523	15.0983	3.38723	1.48529	6.8165	1.53385	66.4616	2.62964	26.7826	5.82152	6.55542	2.46662	250.014	99.7996	0.556505	0.530755
	TB-35	72.4574	131.092	60.2704	16.5	2.3	-26	2.6	0.542986	3.42525	111.565	9.67081	9.58409	0.93614	15.2452	2.34863	0.680873	5.97364	1.08452	58.4257	2.61249	24.6504	3.46571	7.11421	2.80935	259.592	90.1903	0.470359	0.447028
	TB-36	72.5884	131.095	58.37	17	2.1158	-25.878	2.497	0.394586	6.51402	197.26	24.3914	17.9301	4.44817	32.6529	6.03823	3.99004	31.5897	3.08591	125.485	4.23837	50.2547	9.48339	12.936	4.61372	534.911	188.675	0.51206	0.488878
	TB-37	72.7074	131.088	56.6272	18.5	2.3878	-25.98	2.589	0.597786	3.92235	60.8039	6.95532	5.54439	0.906585	8.4797	1.3066	0.892642	4.31177	0.497045	34.3513	1.12525	13.2144	2.2664	3.91678	1.49361	149.988	51.4824	0.48107	0.458493
	TB-38	72.9253	130.842	58.5842	20	2.3458	-25.966	3.054	0.494389	3.70243	84.8719	9.55844	6.02855	2.78667	15.1231	3.21299	3.07126	12.2833	1.0385	40.4112	1.26952	19.5564	4.46197	4.69796	1.84337	213.918	64.6656	0.459801	0.432437
	TB-39	72.9281	130.658	52.2557	20	2.2967	-25.902	2.939	0.53478	4.92324	148.615	14.1707	10.8164	5.09156	30.493	5.01092	6.19884	26.3096	1.22226	62.1035	1.90621	29.7284	4.73449	4.14967	1.73938	357.213	95.9816	0.412535	0.392408
	TB-40	72.927	130.03	35.0363	6	1.5027	-26.006	1.548	0.884921	4.85834	110.863	12.0379	11.3462	2.92707	17.2142	2.60882	2.43719	14.4615	0.689095	68.8092	2.94354	32.6666	5.72505	9.31064	3.83084	302.729	110.786	0.526528	0.499828
	TB-43	72.8915	131.931	90.2323	21.8	1.5581	-25.616	2.739	0.404166	5.70568	125.213	13.6619	9.9572	2.72586	15.1596	3.13029	1.56757	7.61331	1.22969	42.1007	1.92978	24.8481	5.38659	4.22208	1.76485	266.216	71.1709	0.390589	0.362408
	TB-44	72.7058	131.663	74.4074	18.8	2.0935	-25.897	3.011	0.441437	4.17357	90.527	4.89259	7.98423	1.96632	10.6939	1.46075	1.34804	8.31718	0.864134	56.4617	2.59068	23.7211	3.75117	8.66574	3.64365	231.062	88.8485	0.521934	0.495321
	TB-45	72.7001	130.656	42.4704	15	2.2372	-25.904	2.597	0.595687	2.68077	65.2483	6.37742	5.96538	1.45155	8.37708	1.88208	1.16346	10.2881	1.33813	42.3257	1.78667	16.4381	2.87034	5.60348	1.82087	175.617	64.3673	0.520563	0.496602
	TB-46	72.7009	130.175	28.3136	6	2.5797	-26.463	1.367	0.921084	2.56128	53.3869	6.13513	5.75812	0.543911	11.0336	1.8167	0	5.57779	0	45.8211	1.98237	17.7554	3.96063	5.13519	1.44067	162.909	68.7117	0.58769	0.562756
	TB-47	72.4503	130.125	25.0259	N/A	2.78	N/A	N/A	0.947211	5.32025	76.5518	5.74841	8.63233	0	29.8373	0	1.92586	30.7021	1.17847	89.4937	2.83571	31.5383	4.32123	7.58341	2.74633	298.415	128.615	0.644062	0.626881
	TB-48	72.5881	130.123	26.9537	6.5	3.8126	-26.611	2.193	0.94586	3.96076	111.173	16.575	10.1099	2.37878	23.2337	4.46559	4.69399	32.3431	0	91.9441	2.88522	29.4274	5.36031	8.85757	2.80811	350.216	130.229	0.559634	0.53947
	TB-49	72.5878	130.679	44.7677	14	2.0203	-25.784	2.511	0.667199	7.21499	143.955	14.3524	14.0695	3.54269	31.036	5.20662	4.75337	24.1183	1.56953	85.4735	3.17501	33.0136	6.54858	11.7206	4.19449	393.944	130.208	0.500296	0.474928
	TB-50	72.5867	131.661	76.4008	18	1.8157	-25.733	2.485	0.431192	5.68199	135.459	16.8575	11.7395	1.44249	19.1941	3.19435	0.869274	8.97212	0.936692	77.9155	4.03592	32.2934	4.65103	11.6909	4.76738	339.701	121.9	0.499806	0.473657
	TB-52	72.4545	130.668	46.1455	18	1.3372	-25.77	3.071	0.646183	6.382	103.075	12.3261	10.347	1.01	23.6918	5.99798	1.36067	11.5966	1.33431	68.2896	1.99647	28.3556	5.92659	6.73204	2.94353	291.365	103.377	0.525698	0.500733
	TB-54	72.2835	130.593	42.4704	10	0.876	-25.668	1.597	0.505858	10.3735	222.406	26.7771	18.2775	9.00182	45.1558	8.67729	9.48998	49.1691	3.6627	99.7276	2.88011	46.3254	7.96575	13.5179	5.11817	578.525	159.571	0.441108	0.41775
	TB-55	72.2854	131.717	83.3029	17	1.9711	-25.751	3.12	0.504563	4.71253	99.5822	10.434	7.99501	0.981354	13.9437	2.82232	0.637855	6.27713	1.12601	64.9621	2.29036	27.0916	5.43792	9.65079	4.2279	262.173	101.705	0.533011	0.505272
	TB-56	72.0986	131.718	85.0881	15	1.8032	-25.738	3.118	0.487785	2.83559	66.8078	7.16559	4.65325	2.26101	16.2028	3.13839	2.93243	8.98954	0.746828	42.6733	1.59428	17.6991	3.64609	5.92476	2.51399	189.785	66.2971	0.525712	0.498081
	TB-57	72	131.772	92.0192	10	1.8318	-25.702	3.553	0.440534	4.5295	87.0184	7.47592	7.77203	2.08241	28.4531	5.19335	3.01289	8.65708	1.07963	46.7041	1.44832	21.3053	4.52185	5.90081	2.38188	237.537	73.9102	0.485952	0.459273
	TB-59	72.0916	130.063	30.4453	11	1.8696	-25.982	2.136	0.784784	5.27796	108.405	5.92254	6.9904	0.906423	12.9861	2.35793	1.02465	11.0291	0.8681	48.609	1.40382	22.5798	3.88265	6.58887	2.49469	241.327	77.7777	0.441108	0.41775
	YS-9	73.366	129.997	55.2841	23	1.35	N/A	N/A	0.418508	8.7614	162.674	17.882	11.7997	1.4256	27.9402	4.66737	0	11.7705	2.30759	119.603	5.31082	47.0769	7.42892	15.6537	7.04038	451.342	182.334	0.554059	0.528492
	YS-10	73.184	129.996	40.3531	20	1.48	N/A	N/A	0.479782	4.42956	102.703	11.2154	9.4753	3.56799	23.1561	3.85063	4.50657	24.8405	1.2574	57.4897	2.14166	22.0826	4.1587	3.95152	1.51668	280.343	83.5239	0.470724	0.448507
	YS-11	73.019	129.989	32.0488	11	1.97	N/A	N/A	0.701305	3.36788	56.0935	6.03322	6.5377	0.822619	11.1805	1.72491	0.82503	4.13768	0.470408	26.6966	1.01331	15.0363	2.75379	2.65197	0.984014	140.33	44.3849	0.466941	0.441735
	YS-12B	71.922	132.391	101.224	10	0.129	N/A	N/A	0.529563	39.419	312.951	90.6463	57.6902	0	52.9962	9.53249	6.08668	15.9222	0	136.588	0	69.1765	15.7142	12.2702	5.4641	824.457	218.035	0.433228	0.410622
	YS-13	71.968	131.701	90.2323	19	1.89	-25.9	N/A	0.475654	4.9512	112.003	10.8523	8.47136	1.73855	31.6597	5.13293	3.19157	18.7863	1.59735	77.1984	2.57743	32.9993	6.94085	8.30021	3.12552	329.526	118.498	0.539357	0.514089
	YS-14	71.63	130.05	70.0726	7	1.91	-26.2	N/A	0.8772	10.2924	165.908	19.4451	19.0375	5.12588	23.5555	2.99352	3.68511	35.4725	1.69299	96.0611	4.09878	48.3324	9.56028	12.4682	4.47111	462.201	156.862	0.513323	0.485986
	YS-15	71.628	130.054	70.0726	11	2.6	N/A	N/A	0.75772	4.69087	132.254	12.226	10.946	3.97685	21.5424	3.5155	4.04658	31.1342	1.55507	72.3452	2.33116	38.0477	5.70455	11.4375	3.51611	359.27	121.83	0.502123	0.479488
	YS-16	71.627	130.318	75.2444	11	2.08	N/A	N/A	0.638674	7.86085	146.802	13.5241	13.4621	2.66374	22.321	3.3236	3.22841	31.2037	2.32168	97.8677	4.34555	39.6263	8.35873	11.4854	4.42632	412.821	148.979	0.530853	0.503681
	YS-17	71.63	130.191	75.0778	10	1.35	N/A	N/A	0.661061	1.21627	30.7144	3.23268	2.86167	0	8.53442	0.544809	0	4.05903	0.476235	86.096	3.01619	29.9853	5.89207	10.0424	3.59632	190.268	126.124	0.818626	0.804165
	YS-18	73.031	133.002	127.902	15	0.17	N/A	N/A	0.260692	1.9687	64.0738	5.74889	3.86855	0	7.55957	0	0	0	0	30.8292	0	19.1962	3.70313	4.57143	2.17689	143.696	54.5968	0.48556	0.46007
	YS-19	73.035	133.456	141.656	27	1.82	-25.8	N/A	0.351006	2.36586	86.6108	9.12722	5.56216	0.881736	8.1852	1.48425	0	3.94132	0.533183	37.8913	1.52914	18.1575	3.31309	5.90556	0	185.488	61.9543	0.435419	0.417018
	ESAS Offshore
	YS-4	75.987	129.984	293.306	50	1.34	-24.3	N/A	0.0702213	3.49536	76.6575	6.02321	5.87205	0	6.72473	0.944793	0	0	0	10.7154	0	6.44948	1.43153	1.5878	0.837161	120.739	18.7527	0.215209	0.196548
	YS-5	75.266	130.017	212.116	43	1.48	N/A	N/A	0.0888257	2.50588	76.2466	5.78919	4.39679	0.580974	8.93048	0.86224	0	2.36011	0.624244	19.2503	0.935774	10.9556	2.066	4.02973	1.61259	141.146	34.2356	0.337543	0.309875
	YS-6	74.724	130.016	158.04	32	1.86	-25.6	N/A	0.147286	2.85417	73.5195	6.09094	4.64603	0.890059	16.7686	2.76372	0.905587	7.72695	0.768361	31.291	1.42306	15.4068	3.68809	5.57065	2.25336	176.567	52.2685	0.447855	0.415528
	YS-28	72.651	154.185	172.878	28	0.87	-26.2	6.43	0.149301	2.73008	67.5858	8.76347	3.61206	0	5.49336	0.447739	0	0	0	17.6748	0	8.42329	1.39192	2.40337	0	118.526	28.5015	0.306664	0.296621
	YS-31	71.592	161.694	229.202	20	0.56	-26.5	6.81	0.282336	3.07185	98.6532	9.94032	4.38589	0	7.67244	1.30437	1.28168	0	0	38.3581	0	18.4922	2.39595	5.6364	2.61825	193.811	62.4867	0.406255	0.387779
	YS-36	69.817	165.999	160.478	32	0.8	-26	6.69	0.121945	2.36315	72.5295	9.36926	3.84314	1.11852	6.3001	0.655925	0.719049	2.37847	0.678609	22.5388	1.2595	17.8134	3.42907	3.19831	1.3317	149.527	43.5505	0.405984	0.375177
	YS-37	70.135	168.007	245.305	42	0.94	-25.7	7.91	0.0655816	5.42628	136.193	12.4497	6.07584	2.18943	9.96201	0.837549	0.416393	3.8913	1.04155	33.4929	1.52568	20.1597	4.03826	4.19045	1.85321	243.743	57.843	0.323947	0.298104
	YS-38	70.698	169.132	306.258	36	1	-25.3	8.17	0.0521828	4.26803	105.663	9.46823	4.0718	0.996922	10.03	0.850643	0.808158	3.02009	1.10525	12.515	0.827497	8.47838	1.45888	0.894852	0	164.457	21.8882	0.186192	0.171604
	YS-39	71.219	169.373	340.389	44	1.23	-24.3	8.8	0.0178305	4.01963	117.458	10.4153	4.22335	0	6.34365	0.291466	0	2.42839	0.906821	10.03	0	5.51441	1.02605	1.99121	1.22101	165.869	17.5356	0.144146	0.129899
	YS-40	71.483	170.553	391.334	49	1.36	-23.9	9.34	0.0168712	3.16993	113.148	13.4899	4.78252	0	5.59676	0	0	2.13519	1.12383	6.09449	0	3.41477	0	0.774151	0	153.73	10.2834	0.0833125	0.0833125
	YS-41	71.968	171.792	459.415	43	1.32	-23.9	9.34	0.0251249	2.6942	97.4815	10.5386	2.43118	0	11.1667	0.914979	0	4.9467	0.780758	4.09236	0	2.29273	0	0.495397	0	137.835	6.88048	0.065929	0.065929
	YS-86	75.3013	174.396	775.093	200	0.89	-21.2	10.13	0.0102733	0.516604	8.96019	0.792541	1.24039	0	0.345819	0	0	0	0	0	0	0	0	0	0	11.8555	0	0	0
	YS-88	75.0993	172.187	719.512	142	1.04	-21.5	10.21	0.0136474	0	29.6018	3.17392	5.46291	0	1.00233	0	0	0	0	0	0	0	0	0	0	39.2409	0	0	0
	YS-90	74.6682	172.388	683.075	63	0.85	-22.4	9.38	0.0201277	2.04981	57.5952	5.8263	3.99314	0	2.10656	0	0	0	0	0	0	0	0	0	0	71.571	0	0	0
	YS-91	74.4337	170.855	637.685	56	0.82	-23.3	9.55	0.0214194	3.95912	125.834	11.5119	6.63865	0	7.81441	1.42262	0	1.64398	0.475328	0	0	0	0	0	0	159.301	0	0	0
	YS-93	74.4185	165.999	571.775	51	0.8	-23.8	9.65	0.0329273	2.47997	85.1543	8.9784	7.27026	0	38.2461	13.4364	0	0	0	0	0	0	0	0	0	155.565	0	0	0
	YS-95	74.4167	161.335	479.793	45	0.97	-24.8	8.9	0.0385439	3.15503	85.8443	10.8304	5.60707	0	12.8608	2.05381	0	1.86861	0.22695	6.07977	0	2.14152	0	0.650099	0	131.318	8.87139	0.0936633	0.0936633
	YS-98	75.551	160.751	555.282	48	0.77	-23.9	8.5	0.0323697	4.59721	60.478	7.7553	5.11559	0	3.77554	0	0	0	0	2.74125	0	0.783961	0	0	0	85.2469	3.52521	0.0550787	0.0550787
	YS-99	75.171	163.586	585.607	50	0.77	-23.4	8.83	0.0552335	1.75959	33.2224	3.17885	3.4961	0	3.0548	0	0	0	0	0	0	0	0	0	0	44.7117	0	0	0
	YS-100	75.7157	164.079	635.718	58	0.76	-22.4	8.96	0.0277434	1.30586	20.0249	1.99303	2.8456	0	2.39043	0	0	0	0	0	0	0	0	0	0	28.5598	0	0	0
	YS-102	76.5592	160.072	633.685	69	0.77	-22.3	8.87	1e-05	0	28.7657	1.96762	3.85976	0	6.24957	1.18966	0	0	0	0	0	0	0	0	0	42.0323	0	0	0
	YS-104	76.9338	155.169	616.837	57	0.91	-23.1	8.98	0.0521706	1.9614	50.7279	5.16329	3.24431	0	7.34038	2.06725	0	0	0	3.01591	0	1.49579	0	0.485234	0	75.5015	4.99693	0.0896715	0.0896715
	YS-106	76.9685	150.291	600.956	43	0.87	-23.8	7.9	0.0489719	4.06535	84.1735	9.0071	5.48339	0	4.43501	0	0	0	0	4.3395	0	1.97082	0	0.674986	0	114.15	6.98531	0.0766279	0.0766279
	YS-111	74.9973	160.01	497.103	46	0.8	-24.2	7.78	0.0551834	2.52026	87.3133	11.8341	6.87349	0	13.1508	4.65515	0	0	0	6.20772	0	1.90825	0	1.12699	0	135.59	9.24296	0.0957262	0.0957262
	YS-112	74.8327	159.33	470.194	42	0.88	-24.6	7.95	0.0731178	3.43621	97.2507	9.57672	5.42548	0	0	0	0	0	0	10.4606	0	4.9803	0.95621	1.72073	0	133.807	17.1616	0.157043	0.149998
	YS-116	74.5828	157.003	403.531	36	0.6	-25.5	7	0.0712794	2.18061	49.8947	5.49081	0	0	5.98034	2.08658	0	0	0	8.45416	0	4.86885	0	1.44145	0	80.3975	14.7645	0.228343	0.228343
	YS-118	74.3342	156.008	361.38	28	0.71	-25.2	6.39	0.0863499	2.91235	72.2717	12.099	2.53908	0	5.7918	0	0	0	0	23.6643	0	8.81777	1.37196	3.99868	1.96916	135.436	36.4807	0.355255	0.335447
	YS-120	73.2918	155.167	250.859	33	0.99	-25	7.62	0.0873291	2.68694	67.798	9.14408	6.27335	0	13.7843	1.49969	0.555008	0	0	12.299	0	5.88904	1.18374	1.27661	0.675207	123.065	19.4647	0.239264	0.223058
	YS-131	76.3982	125.473	336.689	50	0.4	-24.3	6.31	0.049097	4.14362	163.469	25.896	6.61729	0	30.1419	5.09986	0	0	0	5.55215	0	6.42001	0	0	0	247.34	11.9722	0.0682402	0.0682402
	ESAS Nearshore
	YS-8	73.566	130.008	68.0779	14	0.18	N/A	N/A	0.0967457	6.36179	161.033	12.1661	7.42689	0	16.5496	2.77175	0	0	0	42.4066	0	29.0652	8.01473	5.44463	0	291.24	76.9165	0.345299	0.323247
	YS-26	72.46	150.596	96.1465	1	0.87	-27.4	5.27	0.465837	1.13671	48.0177	4.49987	3.36132	0	7.3213	1.18721	0	0	0	36.0063	0	10.5484	1.52283	4.19194	1.23083	119.024	50.7466	0.527003	0.513815
	YS-27	72.567	152.373	127.608	18	0.41	-26.2	6.03	0.281669	1.48031	42.1035	4.43701	2.29846	0	2.75831	0	0	0	0	13.5783	0	5.75408	1.47732	2.14279	0	76.03	21.4751	0.352811	0.337773
	YS-29	72.2	153.166	110.794	18	0.63	-26.6	5.68	0.321836	0	30.4388	1.79073	1.71994	0	3.40462	0	0	0	0	2.06815	0	6.4433	1.23339	2.5302	0.732519	50.3616	11.0417	0.299394	0.26619
	YS-30	71.358	152.153	42.4704	9	1.35	-27.4	5.03	0.580018	1.47905	47.8358	3.9202	3.47742	0.604583	5.94475	0.803512	0	2.53972	0.294882	27.9783	1.22646	11.5959	2.02653	3.8965	1.23573	114.859	43.4707	0.500645	0.476096
	YS-32	70.567	161.217	111.133	9	0.42	-26.4	6.66	0.3345	3.51526	120.146	17.9362	6.11392	2.17611	6.84731	0	0	0	0	35.8758	0	16.4963	4.12454	3.65904	0	216.89	56.0311	0.33364	0.318039
	YS-33	70.168	161.217	67.3379	8	0.4	-26.2	6.35	0.29953	4.7724	111.142	12.5916	6.18113	0	8.90936	0	0	0	0	54.8476	0	29.3596	6.37277	8.71949	3.96845	246.864	92.9267	0.481638	0.45537
	YS-34B	69.71	162.69	31.6556	10	1.12	-27.3	4.24	0.510661	3.15595	64.3286	10.0599	4.2835	1.88437	11.0998	1.85949	2.86664	15.1183	1.30697	56.014	1.42726	23.0525	4.03117	5.83295	2.28474	208.606	84.8994	0.590188	0.568924
	YS-35	69.817	164.057	85.675	31	1.22	-26.8	5.9	0.279809	4.76348	104.035	10.6225	7.15092	2.41188	28.9866	5.27497	5.73804	16.7471	1.47945	53.435	0	27.6466	4.52902	5.80408	2.37309	280.997	86.8857	0.4741	0.455088
	Dmitry-Laptev Strait
	YS-20	73.305	139.893	232.674	8	0.39	-26.9	4.63	0.500094	3.06219	71.5363	9.40553	3.90208	0	8.29018	0	0	0	0	51.7576	0	16.4401	3.45246	6.78395	2.08535	176.716	74.9817	0.529539	0.511758
	YS-21	73.089	140.348	220.966	15	0.81	-27	4.69	0.462022	1.27522	29.8066	3.93343	2.52141	0	2.60453	0.3058	0	1.48813	0.576466	23.6921	0	6.04057	1.24404	3.31946	1.24252	78.0503	33.0521	0.54386	0.525816
	YS-22	72.875	140.629	206.733	20	1.18	-27.4	4.5	0.660295	1.90391	53.7492	3.20213	5.1864	0.905895	6.4478	0.642049	0	3.93837	0.848483	49.8803	1.67222	16.2117	2.76095	4.38604	1.7287	153.464	70.478	0.587779	0.567332
	YS-22B	72.886	140.619	211.702	15	1.07	-27.4	4.83	0.586672	5.07395	157.429	24.7347	10.4596	2.45526	19.5666	2.13746	3.72717	17.712	3.60911	140.463	0	42.3551	6.36495	12.5929	4.58468	453.265	195.411	0.567253	0.553824
	YS-23	72.789	142.67	256.488	10	0.91	-27.2	5.11	0.537003	2.24603	70.5568	6.02592	4.68012	0.700349	7.24379	0.73436	0	3.14391	0.83848	47.8773	1.93851	14.3661	2.53624	6.01529	2.70169	171.605	68.2586	0.516707	0.491722
	YS-24	73.048	142.667	270.326	15	0.77	-27.4	4.97	0.561246	2.63425	84.1683	9.65436	5.57687	0.969108	8.56154	0	0	4.29545	1.07828	57.1575	0	17.5198	3.35106	6.45586	2.55588	203.978	81.1331	0.508387	0.490819
	YS-25	73.143	142.667	280.335	10	1.02	-27.3	4.83	0.532972	0	123.783	19.4062	7.18961	1.90177	13.8585	3.3309	3.01176	11.2875	1.51643	78.7985	2.32797	25.2185	5.27983	10.7138	5.25988	312.884	114.731	0.50759	0.481025
	a Data taken from Vonk et al. (2012)
	b OC = Organic Carbon
	c BIT = Branched and Isoprenoid Tetraether index (data from Sparkes et al., 2015)
