# Supplementary material for: Source, transport and fate of soil organic matter inferred from microbial biomarker lipids on the East Siberian Arctic Shelf
Source: Copernicus journal article supplement (doi:10.5194/bg-13-4899-2016), 2016-09-06
Supplement: Supplementary file 7 [file Table S4.xlsx]

## Sheet: Sheet1
Table S4. Mean relative abundance (+/- 1 standard deviation) of individual non-methylated soil marker BHPs in all ice complex deposit samples and ESAS sediments from this study.
	Relative abundance (%)
Compound	1a	1b	1b'
	Terrestrial (ICD)
Lena region	54.7 ± 11.6	37.7 ± 10.3	7.6 ± 3.7
Indigirka & Kolyma region	63.9 ± 5.7	26.8 ± 5.7	9.3 ± 5.4
All	57.6 ± 6.1	34.3 ± 10.4	8.1 ± 4.3
	ESAS
Buor Khaya Bay	64.0 ± 4.3	28.0 ± 3.1	8.0 ± 3.2
DLS	70.4 ± 1.2	21.4 ± 1.5	8.3 ± 1.5
ESAS Nearshore	58.1 ± 15.4	32.3 ± 10.8	9.6 ± 5.1
ESAS Offshore	60.4 ± 6.3	31.6 ± 7.1	8.1 ± 3.3
