# Supplementary material for: Source, transport and fate of soil organic matter inferred from microbial biomarker lipids on the East Siberian Arctic Shelf
Source: Copernicus journal article supplement (doi:10.5194/bg-13-4899-2016), 2016-09-06
Supplement: Supplementary file [file bg-13-4899-2016-supplement-title-page.pdf › bg-13-4899-2016-supplement-title-page.pdf]

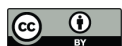

## *Supplement of*

# **Source, transport and fate of soil organic matter inferred from microbial biomarker lipids on the East Siberian Arctic Shelf**

**Juliane Bischoff et al.**

*Correspondence to:* J. Bischoff ([j.bischoff@hw.ac.uk](mailto:j.bischoff@hw.ac.uk)) and B. E. van Dongen ([bart.vandongen@manchester.ac.uk](mailto:bart.vandongen@manchester.ac.uk))

- [bg-13-4899-2016-supplement-title-page.pdf](#)
- [Supplementary Table captions.txt](#)
- [Table S1.xlsx](#)
- [Table S2.xlsx](#)
- [Table S3.xlsx](#)
- [Table S4.xlsx](#)

The copyright of individual parts of the supplement might differ from the CC-BY 3.0 licence.
